# Supplementary material for: Is adjuvant chemotherapy necessary for early gastric cancer?
Source: PubMed Central journal article supplement (PMC9088187; doi:10.20892/j.issn.2095-3941.2020.0636), 2021-06-23
Supplement: cbm-19-518-s001.pdf [file cbm-19-518-s001.pdf]

## Supplementary materials

**Table S1** Clinicopathological characteristics of patients (except for patients who died from other factors) with different treatment regimens

| Variables (n, %)        | pT1N1 (n = 103) |                 |       | pT1N2 (n = 22)  |                   |        | pT1N3 (n = 16) |                   |        |
|-------------------------|-----------------|-----------------|-------|-----------------|-------------------|--------|----------------|-------------------|--------|
|                         | OBS<br>(n = 43) | ACT<br>(n = 60) | P     | S-1<br>(n = 10) | Xelox<br>(n = 12) | P      | S-1<br>(n = 5) | Xelox<br>(n = 11) | P      |
| Age (years)             |                 |                 | 0.550 |                 |                   | 0.415  |                |                   | 0.119  |
| < 60                    | 24 (55.8)       | 29 (48.3)       |       | 7 (70.0)        | 6 (50.0)          |        | 5 (100)        | 6 (54.5)          |        |
| ≥ 60                    | 19 (44.2)       | 31 (51.7)       |       | 3 (30.0)        | 6 (50.0)          |        | 0              | 5 (45.5)          |        |
| Gender                  |                 |                 | 0.690 |                 |                   | 0.192  |                |                   | 0.513  |
| Male                    | 24 (55.8)       | 36 (60.0)       |       | 4 (40.0)        | 9 (75.0)          |        | 1 (20.0)       | 4 (36.4)          |        |
| Female                  | 19 (44.2)       | 24 (40.0)       |       | 6 (60.0)        | 3 (25.0)          |        | 4 (80.0)       | 7 (63.6)          |        |
| Tumor size (cm)         |                 |                 | 0.882 |                 |                   | 0.043* |                |                   | 0.590  |
| ≤ 2                     | 25 (58.1)       | 34 (56.7)       |       | 8 (80.0)        | 4 (33.3)          |        | 2 (40.0)       | 6 (54.5)          |        |
| > 2                     | 18 (41.9)       | 26 (43.3)       |       | 2 (20.0)        | 8 (66.7)          |        | 3 (60.0)       | 5 (45.5)          |        |
| Tumor location          |                 |                 | 0.267 |                 |                   | 0.729  |                |                   | 0.732  |
| Upper                   | 2 (4.7)         | 4 (6.7)         |       | 2 (20.0)        | 1 (8.3)           |        | 0              | 1 (9.1)           |        |
| Middle                  | 8 (18.6)        | 19 (31.7)       |       | 3 (30.0)        | 4 (33.3)          |        | 2 (40.0)       | 5 (45.5)          |        |
| Lower                   | 33 (76.7)       | 37 (61.7)       |       | 5 (50.0)        | 7 (58.3)          |        | 3 (60.0)       | 5 (45.5)          |        |
| Gross type              |                 |                 | 0.229 |                 |                   | 0.415  |                |                   | 0.590  |
| Ulcerated               | 20 (46.5)       | 36 (60.0)       |       | 3 (30.0)        | 6 (50.0)          |        | 2 (40.0)       | 6 (54.5)          |        |
| Non-ulcerated           | 23 (53.5)       | 24 (40.0)       |       | 7 (70.0)        | 6 (50.0)          |        | 3 (60.0)       | 5 (45.5)          |        |
| Differentiation         |                 |                 | 0.293 |                 |                   | 0.162  |                |                   | 0.486  |
| Differentiated          | 5 (11.6)        | 13 (21.7)       |       | 1 (10.0)        | 5 (41.7)          |        | 0              | 1 (9.1)           |        |
| Undifferentiated        | 38 (88.4)       | 47 (78.3)       |       | 10 (90.0)       | 7 (58.3)          |        | 5 (100)        | 10 (90.9)         |        |
| Histopathology          |                 |                 | 0.494 |                 |                   | 0.132  |                |                   | 0.575  |
| Tub                     | 5 (11.6)        | 13 (21.7)       |       | 1 (10.0)        | 5 (41.7)          |        | 0              | 1 (9.1)           |        |
| Por                     | 30 (69.8)       | 39 (65.0)       |       | 8 (70.0)        | 6 (50.0)          |        | 4 (80.0)       | 6 (54.5)          |        |
| Sig                     | 6 (14.0)        | 7 (11.7)        |       | 2 (20.0)        | 0                 |        | 1 (20.0)       | 4 (36.4)          |        |
| Muc                     | 2 (4.7)         | 1 (1.7)         |       | 0               | 1 (8.3)           |        | 0              | 0                 |        |
| Her-2 status            |                 |                 | 0.065 |                 |                   | 0.793  |                |                   | 0.541  |
| Negative                | 40 (93.0)       | 48 (80.0)       |       | 7 (70.0)        | 9 (75.0)          |        | 4 (80.0)       | 10 (90.9)         |        |
| Positive                | 3 (7.0)         | 12 (20.0)       |       | 3 (30.0)        | 3 (25.0)          |        | 1 (20.0)       | 1 (9.1)           |        |
| Depth of invasion       |                 |                 | 0.928 |                 |                   | 0.078  |                |                   | 0.486  |
| T1a                     | 9 (20.9)        | 13 (21.7)       |       | 3 (30.0)        | 0                 |        | 0              | 1 (9.1)           |        |
| T1b                     | 34 (79.1)       | 47 (78.3)       |       | 7 (70.0)        | 12 (100)          |        | 5 (100)        | 10 (90.9)         |        |
| Lymphovascular invasion | 3 (7.0)         | 11 (18.3)       | 0.097 | 2 (20.0)        | 5 (41.7)          | 0.381  | 5 (100)        | 4 (36.4)          | 0.034* |
| Perineural invasion     | 1 (2.3)         | 1 (1.7)         | 0.811 | 0               | 0                 | 1.000  | 2 (40.0)       | 2 (18.2)          | 0.547  |

\* $P < 0.05$  was considered statistically significant. Tub, tubular adenocarcinoma; Por, poorly differentiated adenocarcinoma; Sig, signet-ring cell carcinoma; Muc, mucinous adenocarcinoma; Pap, papillary adenocarcinoma; T1a, mucosal invasion; T1b, submucosal invasion; DSS, disease-specific survival; OBS, observation; ACT, adjuvant chemotherapy.

**Table S2** Univariate and multivariate analyses for the prognoses of pT1N1 gastric cancer patients

| Variables                 | 5-year DSS rate | Univariate | Multivariate |                  |          |
|---------------------------|-----------------|------------|--------------|------------------|----------|
|                           |                 | <i>P</i>   | HR           | 95% CI           | <i>P</i> |
| Age (years)               |                 | 0.019*     |              |                  |          |
| < 60                      | 100%            |            |              |                  |          |
| ≥ 60                      | 90.00%          |            | 193834.2     | 0.000–2.599E+198 | 0.957    |
| Gender                    |                 | 0.311      |              |                  |          |
| Male                      | 93.30%          |            |              |                  |          |
| Female                    | 97.70%          |            |              |                  |          |
| Tumor size (cm)           |                 | 0.42       |              |                  |          |
| ≤ 2                       | 96.60%          |            |              |                  |          |
| > 2                       | 93.20%          |            |              |                  |          |
| Tumor location            |                 | 0.206      |              |                  |          |
| Upper                     | 100%            |            |              |                  |          |
| Middle                    | 88.90%          |            |              |                  |          |
| Lower                     | 97.10%          |            |              |                  |          |
| Gross type                |                 | 0.241      |              |                  |          |
| Ulcerated                 | 92.90%          |            |              |                  |          |
| Non-ulcerated             | 97.90%          |            |              |                  |          |
| Degree of differentiation |                 | 0.172      |              |                  |          |
| Differentiated            | 88.90%          |            |              |                  |          |
| Undifferentiated          | 96.50%          |            |              |                  |          |
| Histopathology            |                 | 0.497      |              |                  |          |
| Tub                       | 88.90%          |            |              |                  |          |
| Por                       | 95.70%          |            |              |                  |          |
| Sig                       | 100%            |            |              |                  |          |
| Muc                       | 100%            |            |              |                  |          |
| Her-2 status              |                 | < 0.001*   |              |                  |          |
| Negative                  | 98.90%          |            |              |                  |          |
| Positive                  | 73.30%          |            | 20.523       | 2.281–184.687    | 0.007*   |
| Depth of tumor invasion   |                 | 0.238      |              |                  |          |
| T1a                       | 100%            |            |              |                  |          |
| T1b                       | 93.80%          |            |              |                  |          |
| Lymphovascular invasion   |                 | 0.691      |              |                  |          |
| Negative                  | 95.50%          |            |              |                  |          |
| Positive                  | 92.90%          |            |              |                  |          |

**Table S2** Continued

| Variables               | 5-year DSS rate | Univariate | Multivariate |        |          |
|-------------------------|-----------------|------------|--------------|--------|----------|
|                         |                 | <i>P</i>   | HR           | 95% CI | <i>P</i> |
| Perineural invasion     |                 | 0.751      |              |        |          |
| Negative                | 95%             |            |              |        |          |
| Positive                | 100%            |            |              |        |          |
| Treatment after surgery |                 | 0.943      |              |        |          |
| OBS                     | 95.30%          |            |              |        |          |
| ACT                     | 95.00%          |            |              |        |          |

\**P* < 0.05 was considered statistically significant. Tub, tubular adenocarcinoma; Por, poorly differentiated adenocarcinoma; Sig, signet-ring cell carcinoma; Muc, mucinous adenocarcinoma; Pap, papillary adenocarcinoma; T1a, mucosal invasion; T1b, submucosal invasion; DSS, disease-specific survival; OBS, observation; ACT, adjuvant chemotherapy.

**Table S3** Univariate analyses for the prognoses of pT1N2 gastric cancer patients

| Variables                 | 5-year DSS rate | <i>P</i> |
|---------------------------|-----------------|----------|
| Age (years)               |                 | 0.816    |
| < 60                      | 92.30%          |          |
| ≥ 60                      | 88.90%          |          |
| Gender                    |                 | 0.08     |
| Male                      | 100%            |          |
| Female                    | 77.80%          |          |
| Tumor size (cm)           |                 | 0.868    |
| ≤ 2                       | 91.70%          |          |
| > 2                       | 90.00%          |          |
| Tumor location            |                 | 0.198    |
| Upper                     | 66.70%          |          |
| Middle                    | 85.70%          |          |
| Lower                     | 100%            |          |
| Gross type                |                 | 0.23     |
| Ulcerated                 | 100%            |          |
| Non-ulcerated             | 84.60%          |          |
| Degree of differentiation |                 | 0.486    |
| Differentiated            | 83.30%          |          |
| Undifferentiated          | 93.80%          |          |
| Histopathology            |                 | 0.885    |
| Tub                       | 83.30%          |          |

**Table S3** Continued

| Variables               | 5-year DSS rate | <i>P</i> |
|-------------------------|-----------------|----------|
| Por                     | 92.30%          |          |
| Sig                     | 100%            |          |
| Muc                     | 100%            |          |
| Her-2 status            |                 | 0.486    |
| Negative                | 93.80%          |          |
| Positive                | 83.30%          |          |
| Depth of tumor invasion |                 | 0.569    |
| T1a                     | 100%            |          |
| T1b                     | 89.50%          |          |
| Lymphovascular invasion |                 | 0.031*   |
| Negative                | 100%            |          |
| Positive                | 71.40%          |          |
| Treatment after surgery |                 | 0.922    |
| S-1                     | 90.00%          |          |
| Xelox                   | 91.70%          |          |

\**P* < 0.05 was considered statistically significant. Tub, tubular adenocarcinoma; Por, poorly differentiated adenocarcinoma; Sig, signet-ring cell carcinoma; Muc, mucinous adenocarcinoma; Pap, papillary adenocarcinoma; T1a, mucosal invasion; T1b, submucosal invasion; DSS, disease-specific survival; OBS, observation; ACT, adjuvant chemotherapy.

**Table S4** Univariate analyses for the prognoses of pT1N3 gastric cancer patients

| Variables                 | 5-year DSS rate | <i>P</i> |
|---------------------------|-----------------|----------|
| Age (years)               |                 | 0.418    |
| < 60                      | 54.50%          |          |
| ≥ 60                      | 80.00%          |          |
| Gender                    |                 | 0.418    |
| Male                      | 80.00%          |          |
| Female                    | 54.50%          |          |
| Tumor size (cm)           |                 | 0.957    |
| ≤ 2                       | 62.50%          |          |
| > 2                       | 62.50%          |          |
| Tumor location            |                 | 0.228    |
| Upper                     | 100%            |          |
| Middle                    | 42.90%          |          |
| Lower                     | 75.00%          |          |
| Gross type                |                 | 0.366    |
| Ulcerated                 | 50.00%          |          |
| Non-ulcerated             | 75.00%          |          |
| Degree of differentiation |                 | 0.481    |
| Differentiated            | 100%            |          |
| Undifferentiated          | 60.00%          |          |
| Histopathology            |                 | 0.196    |
| Tub                       | 100%            |          |
| Por                       | 70.00%          |          |
| Sig                       | 40.00%          |          |
| Her-2 status              |                 | 0.464    |
| Negative                  | 64.30%          |          |
| Positive                  | 50.00%          |          |
| Depth of tumor invasion   |                 | 0.481    |
| T1a                       | 100%            |          |
| T1b                       | 60.00%          |          |
| N stage                   |                 | 0.537    |
| N3a                       | 66.70%          |          |
| N3b                       | 50.00%          |          |
| Lymphovascular invasion   |                 | 0.134    |
| Negative                  | 85.70%          |          |
| Positive                  | 44.40%          |          |

**Table S4** Continued

| Variables               | 5-year DSS rate | <i>P</i> |
|-------------------------|-----------------|----------|
| Perineural invasion     |                 | 0.052    |
| Negative                | 75.00%          |          |
| Positive                | 25.00%          |          |
| Treatment after surgery |                 | 0.030*   |
| S-1                     | 20.00%          |          |
| Xelox                   | 81.80%          |          |

\**P* < 0.05 was considered statistically significant. Tub, tubular adenocarcinoma; Por, poorly differentiated adenocarcinoma; Sig, signet-ring cell carcinoma; Muc, mucinous adenocarcinoma; Pap, papillary adenocarcinoma; T1a, mucosal invasion; T1b, submucosal invasion; DSS, disease-specific survival; OBS, observation; ACT, adjuvant chemotherapy.
